# Supplementary material for: Hypothalamic leptin action is mediated by histone deacetylase 5
Source: PubMed Central journal article supplement (PMC4773494; doi:10.1038/ncomms10782), 2016-02-29
Supplement: ncomms10782-s1.pdf [file ncomms10782-s1.pdf]

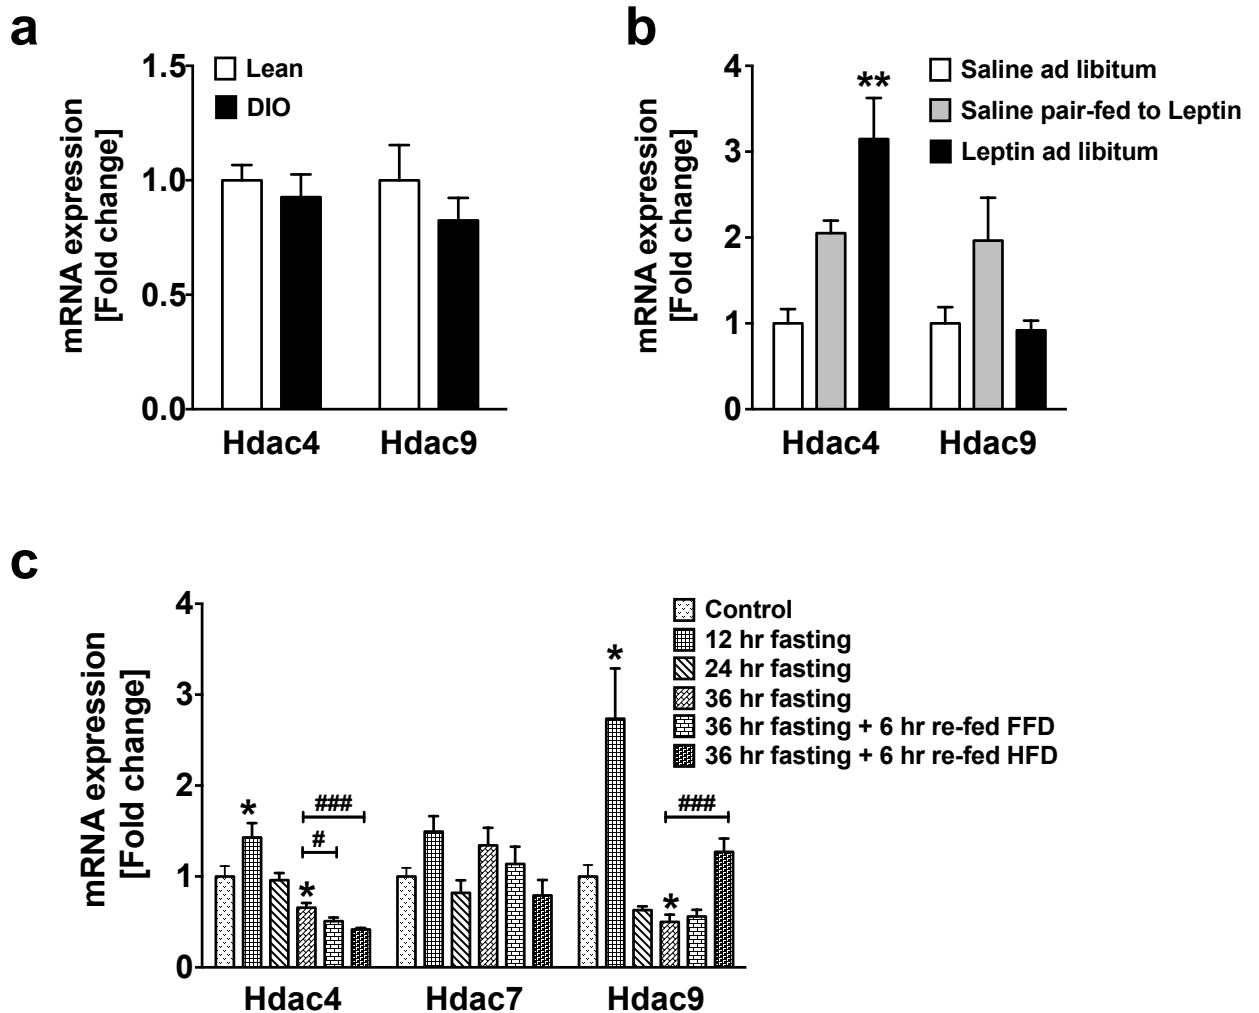

**Supplementary Fig. 1: Impact of diet-induced obesity, exogenous leptin treatment and prolonged fasting and re-feeding on gene expression of HDAC class IIa family members.** (a) Quantitative PCRs revealed unchanged hypothalamic mRNA levels of HDAC class IIa family members *Hdac4* and 9 in male C57BL/6J mice subjected to chronic chow versus high-fat diet feeding (n=7). (b) *Hdac4* mRNA levels were increased in leptin-deficient *Lep<sup>ob</sup>* mice treated subcutaneously for 6 d with 1 mg/kg leptin (Leptin ad libitum), compared to ad libitum fed saline control mice (Saline ad libitum). Mice pair-fed to the lower food consumption of the Leptin ad lib group revealed a non-significant increase in

*Hdac4* mRNA levels, *Hdac9* mRNA levels remained unchanged throughout all groups (n=5-6). **(c)** Hypothalamic gene expression of *Hdac4*, 7 and 9 was further assessed in lean male C57BL/6J mice after prolonged fasting and re-feeding; hypothalamic *Hdac4* and 9 mRNA levels were increased slightly with short-term food deprivation but decreased after prolonged fasting. Re-feeding with fat-free diet (FFD) and high-fat diet (HFD) decreased hypothalamic *Hdac4* mRNA levels. In contrast, hypothalamic *Hdac9* levels were slightly increased with re-feeding of HFD, and *Hdac7* mRNA levels remained unaffected by changes in nutrient availability (n=6-8). Values represent means  $\pm$  s.e.m. Statistical analyses were done by two-tailed unpaired Student's t tests (a), or Two-Way ANOVA followed by Bonferroni or Dunnett post-hoc tests, respectively (b,c). a,b: \*\*p<0.01, c: \*p>0.05 vs. Control, #p>0.05 36 hr fasting vs. 36 hr fasting + 6 hr re-fed FFD, ###p<0.001 36 hr fasting vs. 36 hr fasting + 6 hr re-fed HFD.

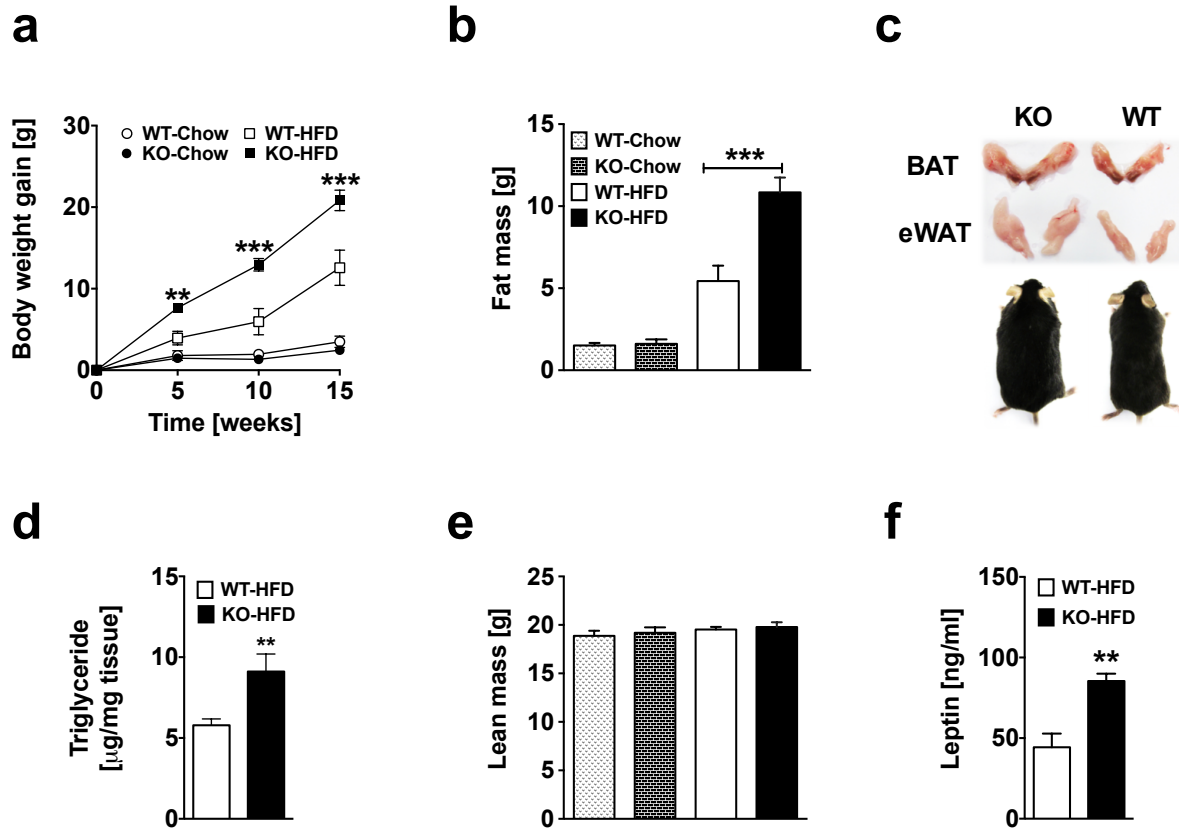

**Supplementary Fig. 2: Increased adiposity in HFD-fed HDAC5 KO mice:** Female HDAC5 WT and KO littermates were subjected either to chow or HFD, and evaluated for **(a)** body weight gain over a total of 15 wk; **(b)** fat mass after 8 wk of chow or HFD exposure (n=6) in female WT and HDAC5 KO mice. **(c)** Representative figures from epididymal white adipose tissue (eWAT) and brown adipose tissue (BAT) with interscapular WAT from male HDAC5 KO mice and WT littermates (n=9-10) subjected to 10 wk of HFD. **(d)** Liver triglyceride content in WT and HDAC5 KO mice (n=9-10) subjected to 10 wk of HFD **(e)** Lean mass after 8 wk of chow or HFD exposure (n=6), and **(f)** plasma leptin levels after 16 wk of HFD exposure in female HDAC5 WT and KO mice. Values represent means  $\pm$  s.e.m. Statistical analyses were done by either Two-Way ANOVA followed by Bonferroni post-hoc tests (a) or two-tailed unpaired Student's t tests (b,d,e,f). a,b: \*\*p<0.01 and \*\*\*p<0.001 WT-HFD vs. KO-HFD; d,f: \*\*p<0.01.

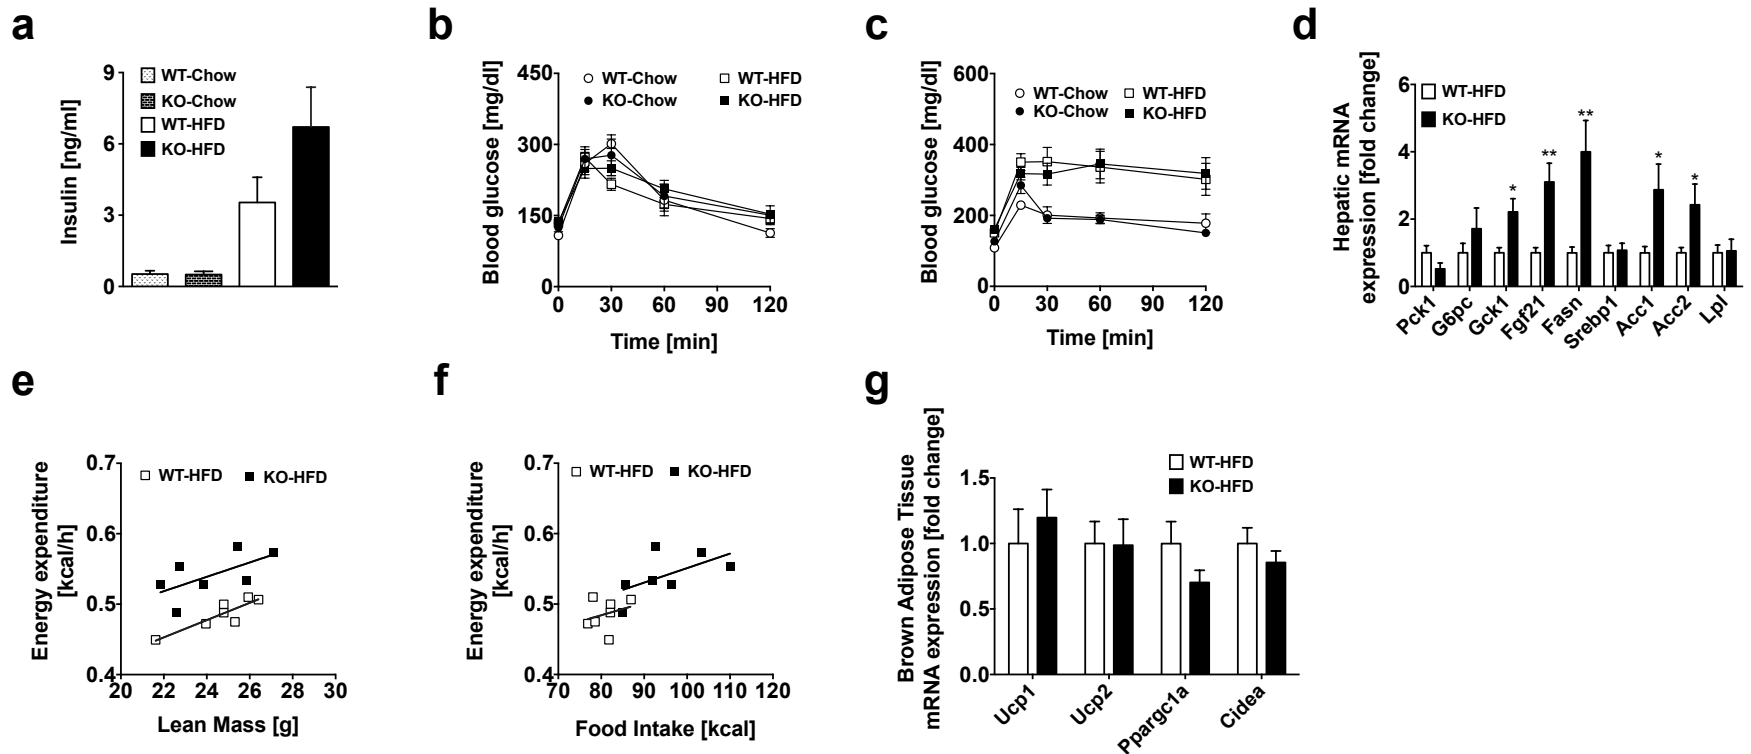

**Supplementary Fig. 3: Glucose homeostasis and energy expenditure in female and male HDAC5 WT and KO mice exposed to either chow or HFD: (a)** Plasma insulin levels of female HDAC5 WT and KO mice after 16 wk of chow and HFD exposure (n=5-6). **(b)** Glucose tolerance tests were carried out in female HDAC5 WT and KO mice after 15 wk of diet exposure (n=4-6). **(c)** Glucose tolerance tests after 15 wk of dietary exposure of male HDAC5 WT and KO mice to chow or HFD (n=6-8). **(d)** Hepatic gene expression of phosphoenolpyruvat carboxykinase 1 (*Pck1*), glucose-6-phosphatase (*G6pc*), glucokinase (*Gck1*), fibrioblast growth factor 21 (*Fgf21*), fatty acid synthase (*Fasn*), Sterol regulatory element-binding protein 1 (*Srebp1*), acetyl-CoA carboxylase 1 and 2 (*Acc1*, *Acc2*) and lipoprotein lipase (*Lpl*) was measured in male HDAC5

WT and KO mice exposed to HFD for 10 weeks (n=9-10). Energy expenditure, plotted against **(e)** lean mass or **(f)** food intake, in male HDAC5 WT and KO littermates subjected to HFD for one wk. **(g)** RNA from brown adipose tissue (BAT) of male HDAC5 WT and KO mice exposed to HFD for 10 weeks (n=7-10) was subjected to qPCR analyses of uncoupling protein 1 and 2 (*Ucp1*, *Ucp2*), peroxisome proliferator-activated receptor gamma coactivator 1-alpha (*Ppargc1a*) and cell death-inducing dffa-like effector A (*Cidea*). Values represent means  $\pm$  s.e.m. Statistical analyses were done by two-tailed unpaired Student's t-test (a, d, g), Two-Way ANOVA followed by Bonferroni post-hoc tests (b, c), or correlation analyses (e, f). \*p<0.05 and \*\*p<0.01.

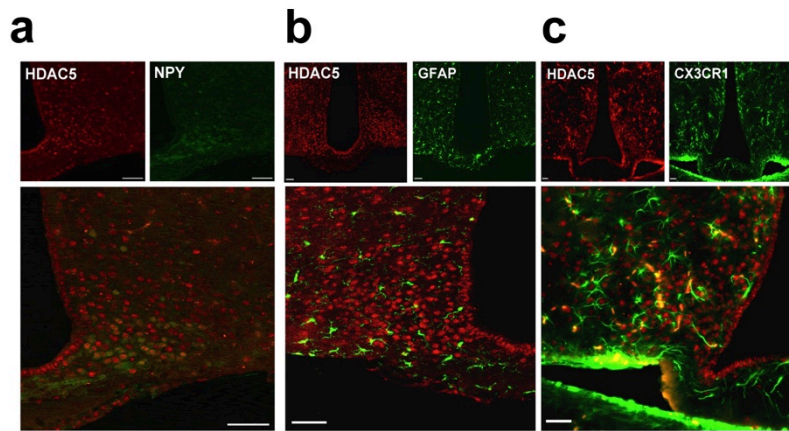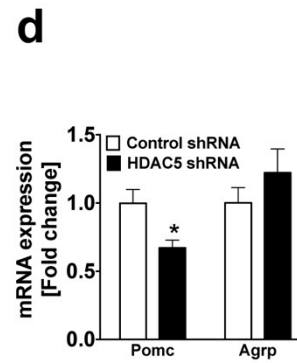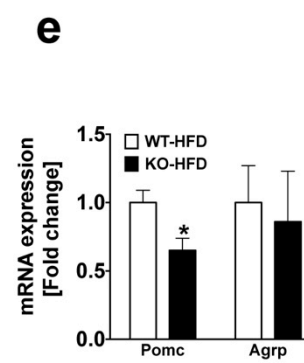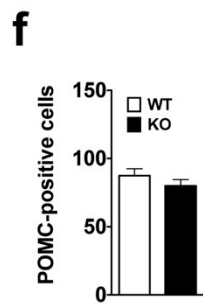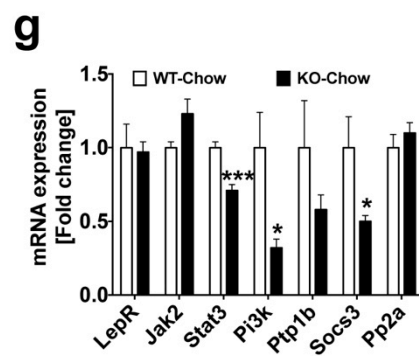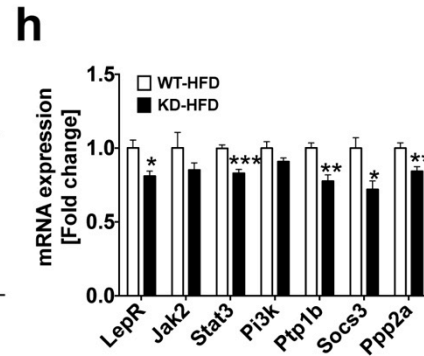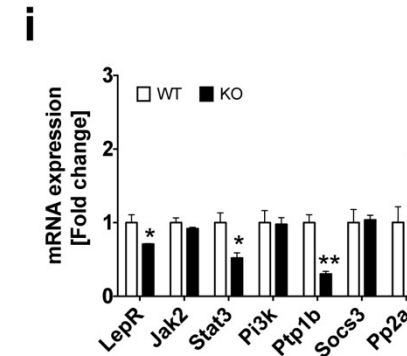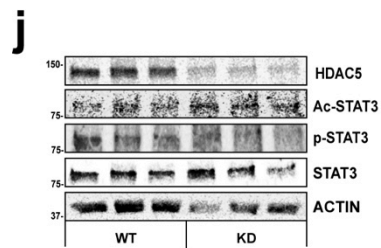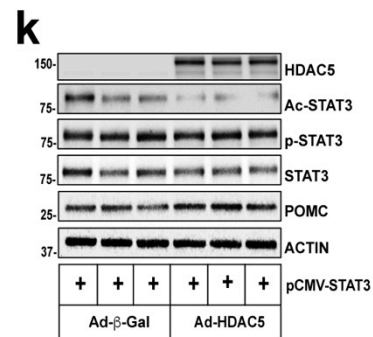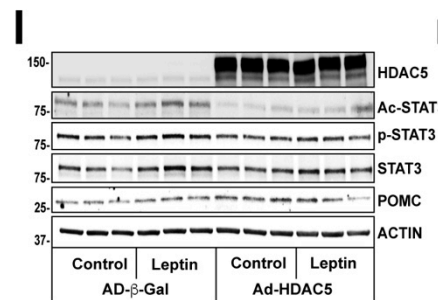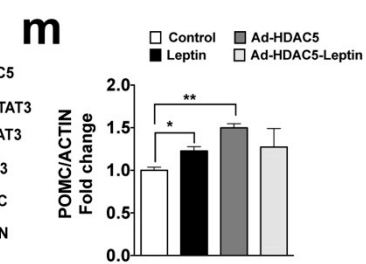

**Supplementary Fig. 4: Hypothalamic expression and post-translational modification of HDAC5 and key leptin signaling components:** Hypothalamic co-localization of HDAC5 with NPY-positive neurons **(a)**, glial fibrillary acidic protein (GFAP)-positive astrocytes **(b)** and CX3CR1-positive microglia **(c)** in coronal sections of male chow-fed NPY-GFP, C57BL/6J and microglia-GFP mice (scale bars: 50 $\mu$ m). Hypothalamic *Pomc* and *Agrp* mRNA levels in **(d)** C57BL/6J mice with mediobasal hypothalamic knockdown of HDAC5 compared to non-silencing controls after 10 wk of HFD exposure (n=6), or in **(e)** laser-capture-micro-dissected arcuate nucleus of male HDAC5 WT or KO mice after 16 wk of HFD exposure (n=3-4). **(f)** The number of stained cells in hypothalamic slices after immunohistochemical detection of POMC was counted in male chow-fed WT and HDAC5 KO mice (n=3). Hypothalamic mRNA expression of genes critical for leptin signaling from male HDAC5 WT and KO littermates (n=6) fed chow diet **(g)**, age (10-12 weeks), from 10-wk-HFD-fed mice (n=6) with lentiviral shRNA-mediated knockdown of HDAC5 or scramble control shRNA in the mediobasal hypothalamus **(h)**, or from primary hypothalamic neurons **(i)** obtained from HDAC5 KO and WT embryos (n=3). **(j)** Representative western blots for total HDAC, acetylation and phosphorylation of STAT3, total STAT3 and reference protein actin in WT (non silencing shRNA) and HDAC5-knockdown (KD) CLU177 cells. **(k)** Representative immunoblots from CLU177 cells transiently transfected with STAT3 and subjected to Beta-Gal control or HDAC5-GFP adenovirus (AV) treatment for 48 hr. Representative immunoblots **(l)** and densitometric analysis **(m)** from primary hypothalamic neurons subjected to transduction with beta-gal control AV or HDAC5-GFP AV followed by treatment with and without leptin (100ng/ml, n=3). Values represent means  $\pm$  s.e.m. Statistical analyses were done by either two-tailed unpaired Student's t-test (d,e,f,g,h,i,) or One-Way ANOVA followed by Bonferroni post-hoc tests (m) . \*p<0.05, \*\*p<0.01 and \*\*\*p<0.001.

**a**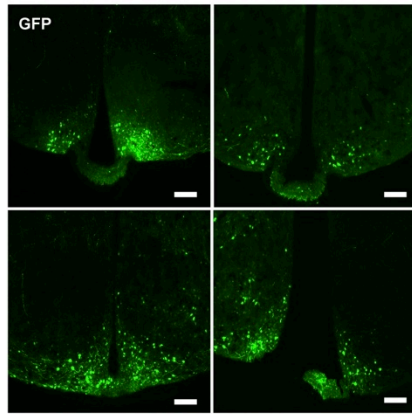**b**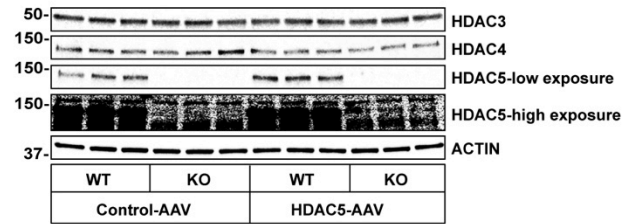**c**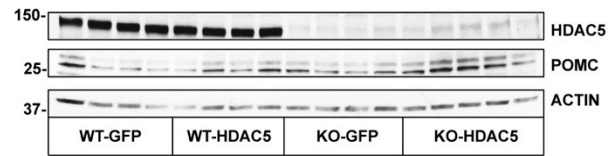**d**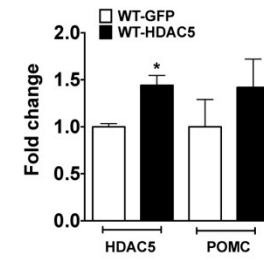**e**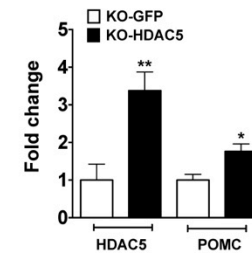**f**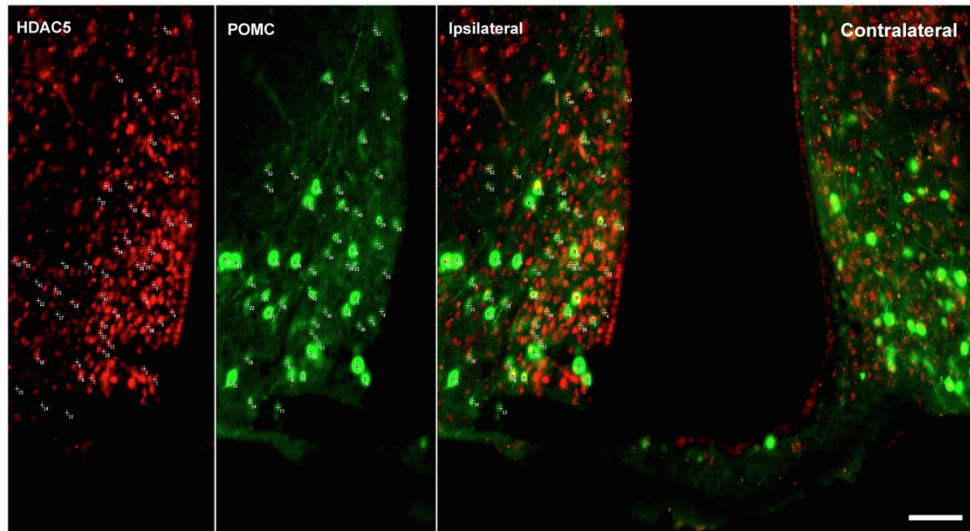**g**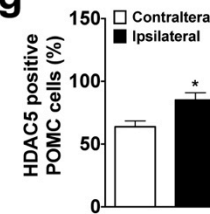**h**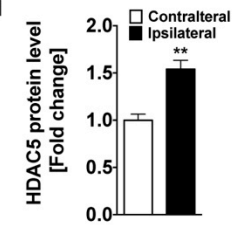



**Supplementary Fig. 5: Viral overexpression of GFP or HDAC5 in the mediobasal hypothalamus of WT and HDAC5 KO mice:**

**(a)** GFP fluorescence 2 weeks after bilateral intracranial infusion of GFP-overexpressing AAV into the mediobasal hypothalamus of C57Bl/6J mice fed chow diet (scale bar: 100 $\mu$ m). **(b-e)** Representative immunoblots (b: detection via Licor Odyssey; c: film detection) and densitometric analyses of ACTIN, HDAC3, HDAC4, HDAC5 and POMC in chow-fed mice with MBH-specific overexpression of GFP (Control AAV) or HDAC5. Ipsilateral infusion of HDAC5-overexpressing AAV into the MBH of chow-fed POMC-GFP mice reveals increased colocalization of HDAC5 in POMC neurons **(f,g)** and higher overall HDAC5 immunoreactivity **(h)**, compared to the uninjected contralateral side of the MBH (scale bar: 100 $\mu$ m). Values represent means  $\pm$  s.e.m. Statistical analyses were done by two-tailed unpaired Student's t-test. \* $p < 0.05$ , \*\* $p < 0.01$ .

Fig 1d, original Western Blots

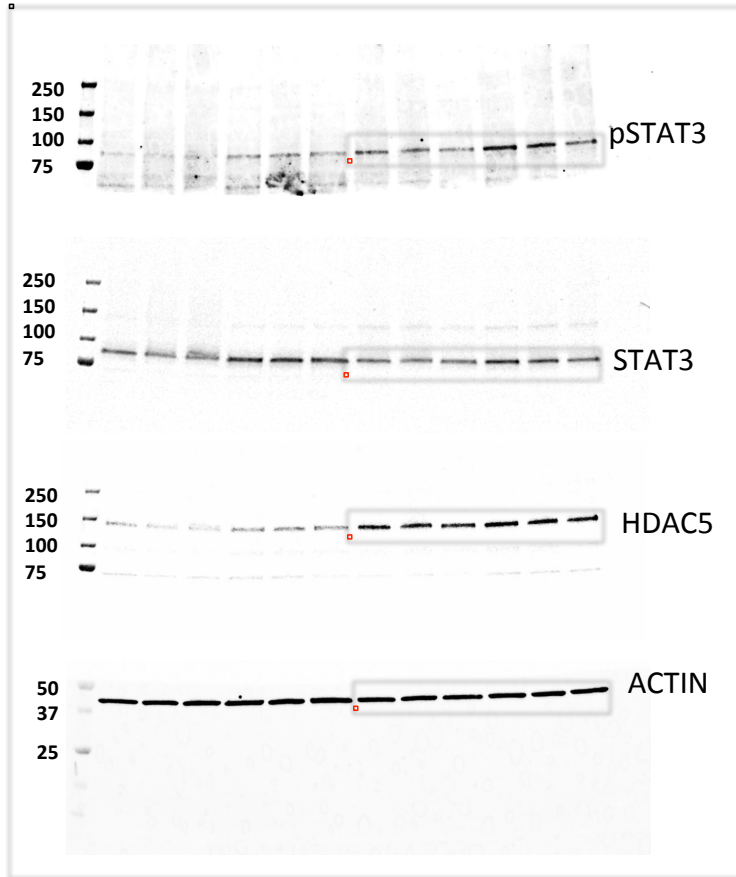

Fig 1f, original Western Blot

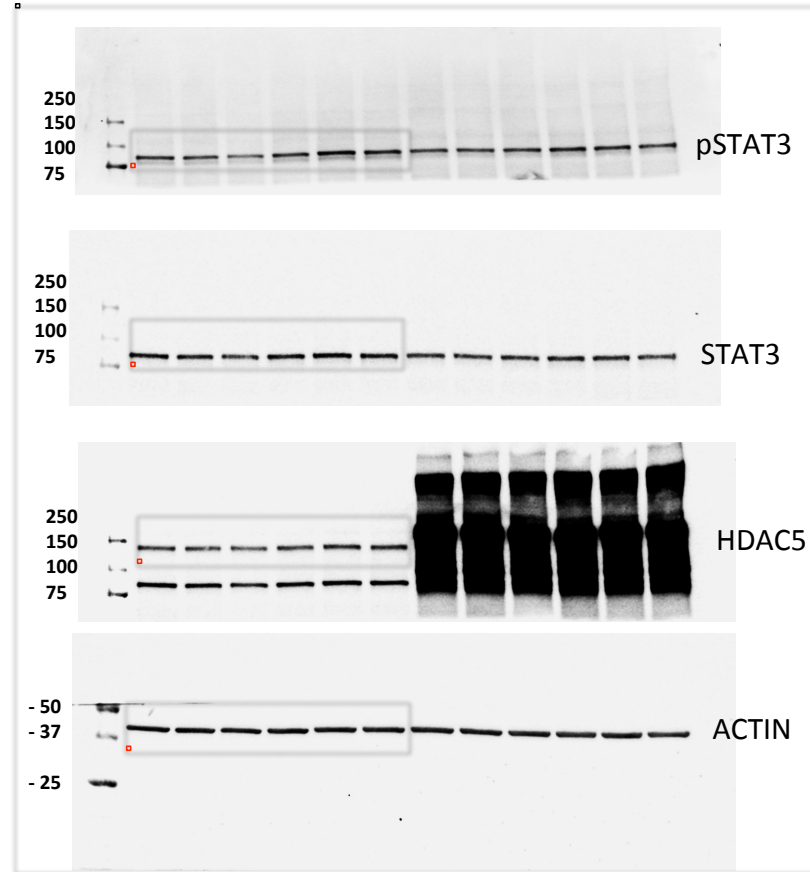

Supplementary Figure 6: Original Western Blots for figure 1, panels d and f.

**Fig 4c, original Western Blot**

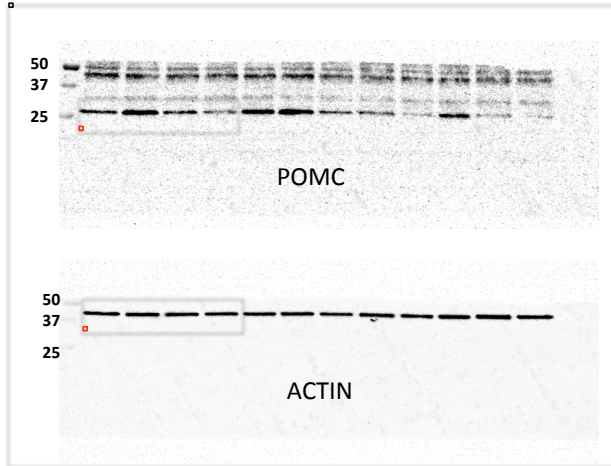

**Fig 4f, original Western Blot**

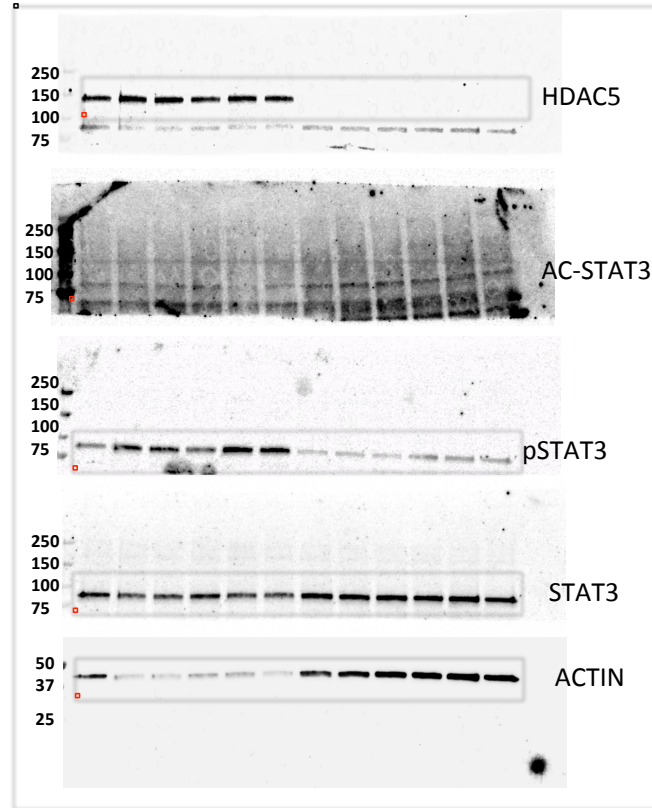

**Fig. 4h, original Western Blots**

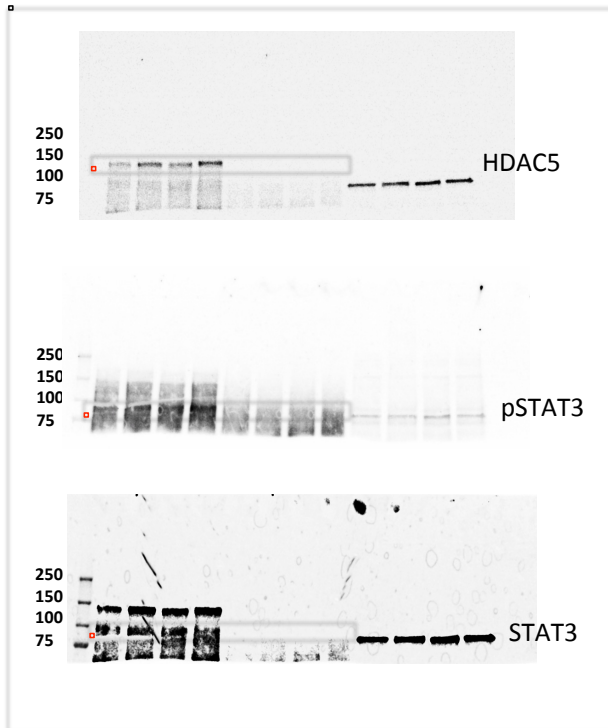

**Supplementary Figure 7: Original Western Blots for figure 4, panels c, f and h.**

## Supplementary Figure 8

### Supplementary Fig. 4j, original Western Blots

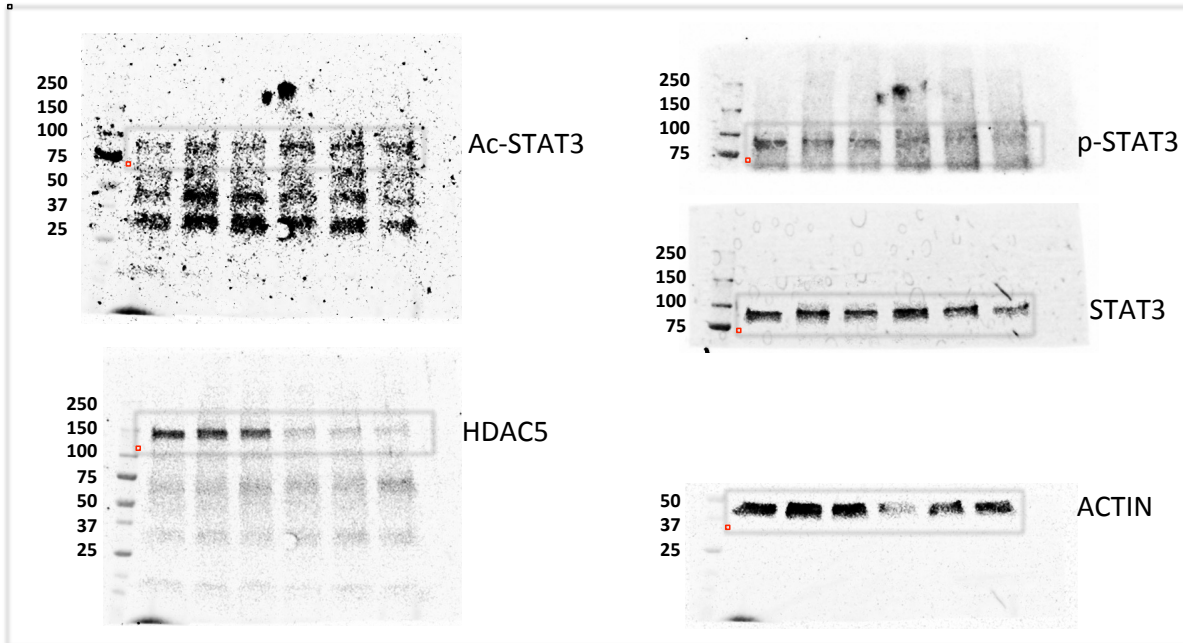

### Supplementary Fig. 4k, original Western Blots

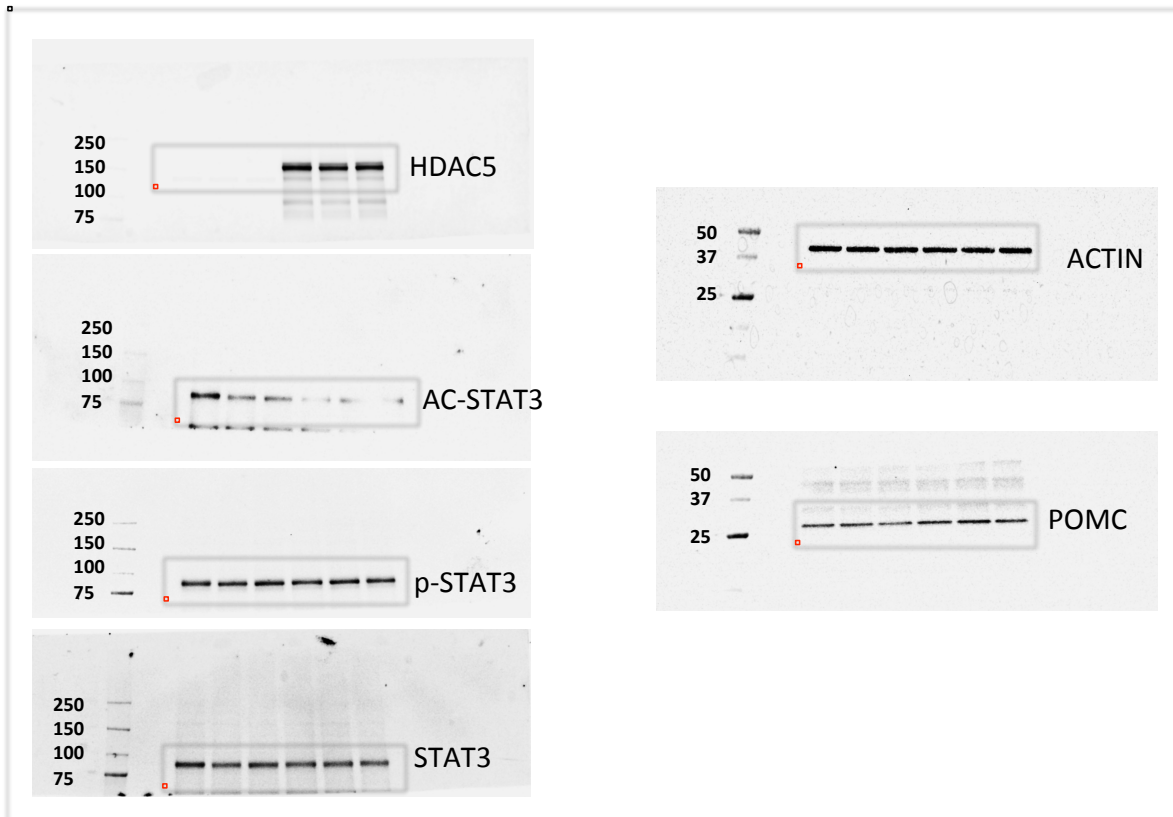

## Supplementary Fig. 8, continued

Supplementary Fig. 4I, original Western Blots

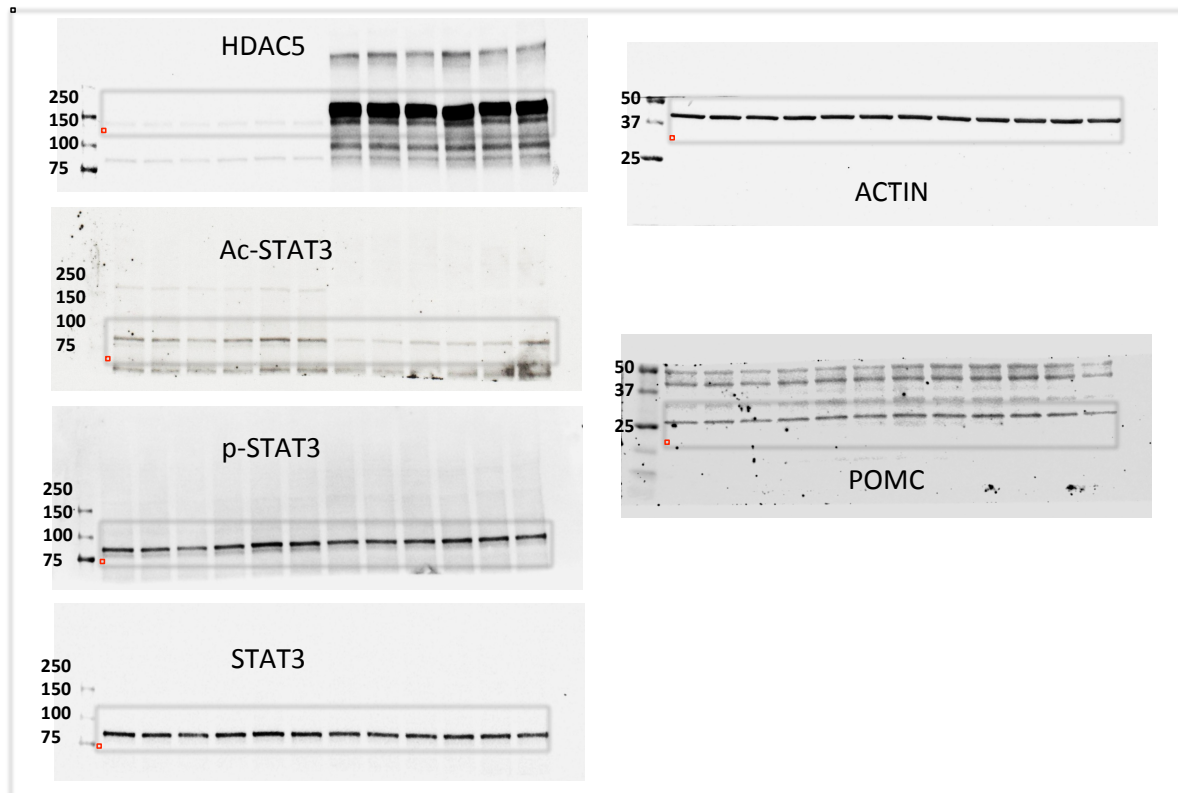

Supplementary Figure 8: Original Western Blots for supplementary figure 4, panels j, k and l.

Supplementary Fig. 5b, original Western Blots

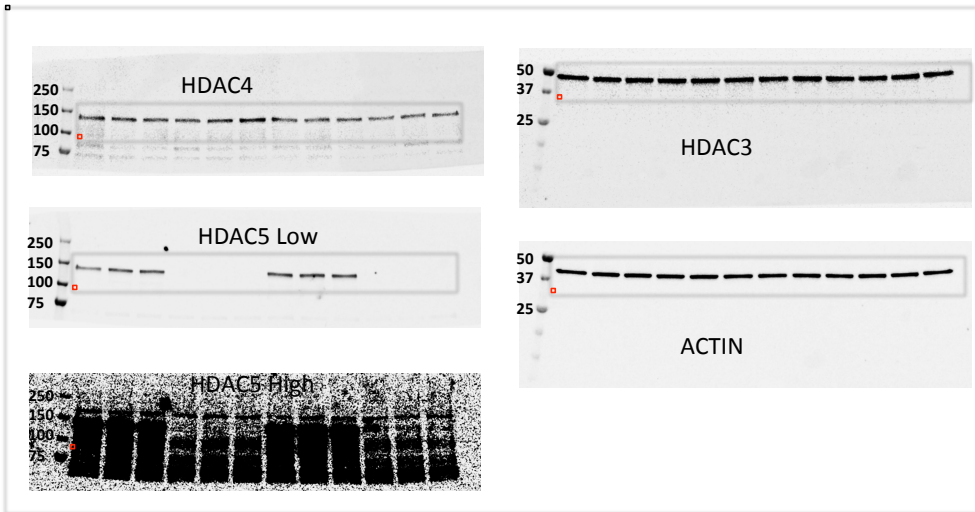

Supplementary Fig. 5c, original Western Blots

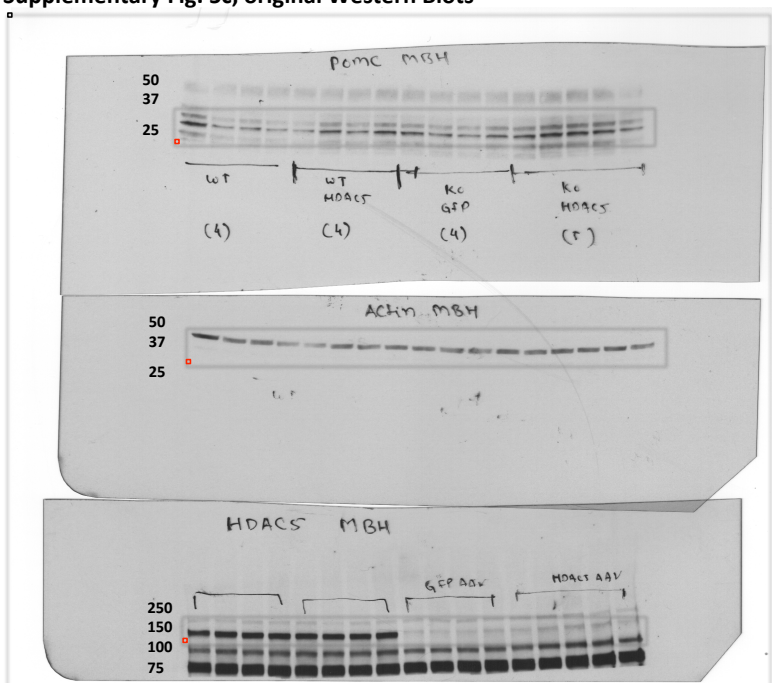

Supplementary Fig. 9: Original Western Blots for supplementary figure 5, panels b and c.

**Supplementary Table 1: Increased adipose tissue to body weight ratio in HDAC5 KO**

**compared to WT:** The ratio of tissue mass to total body mass was compared in male HDAC5 KO compared to WT mice at week 10 of the HFD challenge. Values represent means  $\pm$  s.e.m. Statistical analyses were done using two-tailed unpaired Student's t test.

\*p<0.05, \*\*p<0.01 and \*\*\*p<0.001

| <b>Tissue: Body weight Ratio [g/g]</b> | <b>WT</b>          | <b>KO</b>             |
|----------------------------------------|--------------------|-----------------------|
| Liver                                  | 0.036 $\pm$ 0.002  | 0.046 $\pm$ 0.002 *   |
| WAT                                    | 0.037 $\pm$ 0.005  | 0.053 $\pm$ 0.002 *   |
| Bat with <i>interscapular</i> fat      | 0.017 $\pm$ 0.002  | 0.036 $\pm$ 0.003 *** |
| BAT                                    | 0.004 $\pm$ 0.0003 | 0.005 $\pm$ 0.0004    |
| Heart                                  | 0.005 $\pm$ 0.0002 | 0.004 $\pm$ 0.0003    |

**Supplementary Table 2: List of mouse taqman probes used for qPCR.**

| <b>Gene Name</b>                                                            | <b>ID</b> | <b>Assay ID</b> |
|-----------------------------------------------------------------------------|-----------|-----------------|
| Acetyl-CoA carboxylase 1                                                    | Acc1      | Mm01304257_m1   |
| Acetyl-CoA carboxylase 2                                                    | Acc2      | Mm01204671_m1   |
| Cell death-inducing DNA fragmentation factor, alpha subunit-like effector A | Cdiea     | Mm00432554_m1   |
| Fatty acid binding protein 4, adipocyte                                     | Fabp4     | Mm00445878_m1   |
| Fatty acid synthase                                                         | Fasn      | Mm00662319_m1   |
| Fibroblast growth factor 21                                                 | Fgf21     | Mm00840165_g1   |
| Glucokinase                                                                 | Gck1      | Mm00439129_m1   |
| Hypoxanthine phospho ribosyltransferase 1                                   | Hprt1     | Mm01545399_m1   |
| Lipoprotein lipase                                                          | Lpl       | Mm01345523_m1   |
| Peroxisome proliferative activated receptor, gamma, coactivator 1 alpha     | Pgc1a     | Mm01208835_m1   |
| Protein phosphatase 2A                                                      | Pp2a      | Mm00479816_m1   |
| Ribosomal protein L32                                                       | L32       | Mm00777741_sH   |
| Sterol regulatory element binding transcription factor 1                    | Srebp1    | Mm00550338_m1   |
| Suppressor of cytokine signaling 3                                          | Socs3     | Mm00545913_s1   |
| Uncoupling protein 1                                                        | Ucp1      | Mm01244861_m1   |
| Uncoupling protein 2                                                        | Ucp2      | Mm00627599_m1   |



**Supplementary Table 3: List of mouse primer pairs used for qPCR.**

| <b>Gene Name</b>                                   | <b>Id</b> | <b>Reverse primer</b>  | <b>Forward primer</b> |
|----------------------------------------------------|-----------|------------------------|-----------------------|
| Agouti related protein homolog                     | Agrp      | GGCCTCAAGAAGACAACACTGC | GCAAAAGGCATTGAAGAAGC  |
| Glucose 6-phosphatase                              | G6Pase    | GTTGAACCAGTCTCCGACC    | CGACTCGCTATCTCCAAGTG  |
| Hypoxanthine phospho- ribosyl transferase 1        | Hprt1     | AAGCTTGCTGGTGAAAAGGA   | TTGCGCTCATCTTAGGCTTT  |
| Janus kinase 2                                     | Jak2      | GGTGTCTGTGTCTGTGGAGA   | CCCCGTTCTCCTGTCTTCTT  |
| Leptin Receptor                                    | LepR      | CGTGGTGAAGCATCGTACTG   | GGGCCATGAGAAGGTAAGGT  |
| Phosphatidyl inositol 3-kinase                     | Pi3k      | CACCCAAGCCCCTACTGTA    | GAGTGTAATCGCCGTGCATT  |
| Phosphoenol pyruvate carboxykinase 1               | Pck1      | CAGCAACTGCCCGTACTCC    | CTGCATAACGGTCTGGACTTC |
| Proopio melanocortin                               | Pomc      | CATTAGGCTTGGAGCAGGTC   | TCTTGATGATGGCGTTCTTG  |
| Protein-Tyrosine Phosphatase 1B                    | Ptp1b     | CCGAGATGTCAGCCCTTTTG   | CCACACCATCTCCCAGAAGT  |
| Signal transducer and activator of transcription 3 | Stat3     | AATGGAAATTGCCCGGATCG   | TCCTGAAGATGCTGCTCCAA  |

**Supplementary Table 4: List of rat primer pairs used for qPCR.**

| Gene Name                                          | Id    | Reverse primer        | Forward primer       |
|----------------------------------------------------|-------|-----------------------|----------------------|
| Agouti related protein homolog                     | Agrp  | CGACGGGTTCGCAGCAAGGTA | TGGCGGAGGTGCTAGATCAG |
| Hypoxanthine phospho-ribosyl transferase 1         | HPRT1 | GTCAAGCAGTACAGCCCCAA  | TGGCCACATCAACAGGACTC |
| Janus kinase 2                                     | Jak2  | CATGGGAATGTGTGTGCCAA  | CTTGTCTCCTCCACTGCAGA |
| Leptin Receptor                                    | LepR  | AATCAAATCGGCCAGCCTG   | CCAGAATTCAGGCCCTCTCA |
| Phosphatidylinositol 3-kinase                      | Pi3k  | TAGTGTCCGGGAAAATGGCT  | GGCATGCTCTTCGATCACAG |
| Proopiomelanocortin                                | Pomc  | GAAGGTGTACCCCAATGTCG  | CTTCTCGGAGGTCATCAAGC |
| Protein phosphatase 2A                             | Pp2a  | CTCGTCGTACCCAGACTAC   | GCACATCTTTGGTCCGTGT  |
| Protein-Tyrosine Phosphatase 1B                    | Ptp1b | TCGACATGAAGCCAGTGACT  | CCACACCATCTCCAGAAGT  |
| Ribosomal protein L32                              | L32   | GGTGAAGCCCAAGATCGTCA  | CAGCACTTCCAGCTCCTTGA |
| Signal transducer and activator of transcription 3 | Stat3 | TCAGTGAGAGCAGCAAGGAA  | TTTCCGAATGCCTCCTCCTT |
| Suppressor of cytokine signaling 3                 | Socs3 | CCTCAAGACCTTCAGCTCCA  | CGACGCTCAGTGTGAAGAAG |
